# Supplementary material
Source: PubMed Central journal article supplement (PMC6438713)

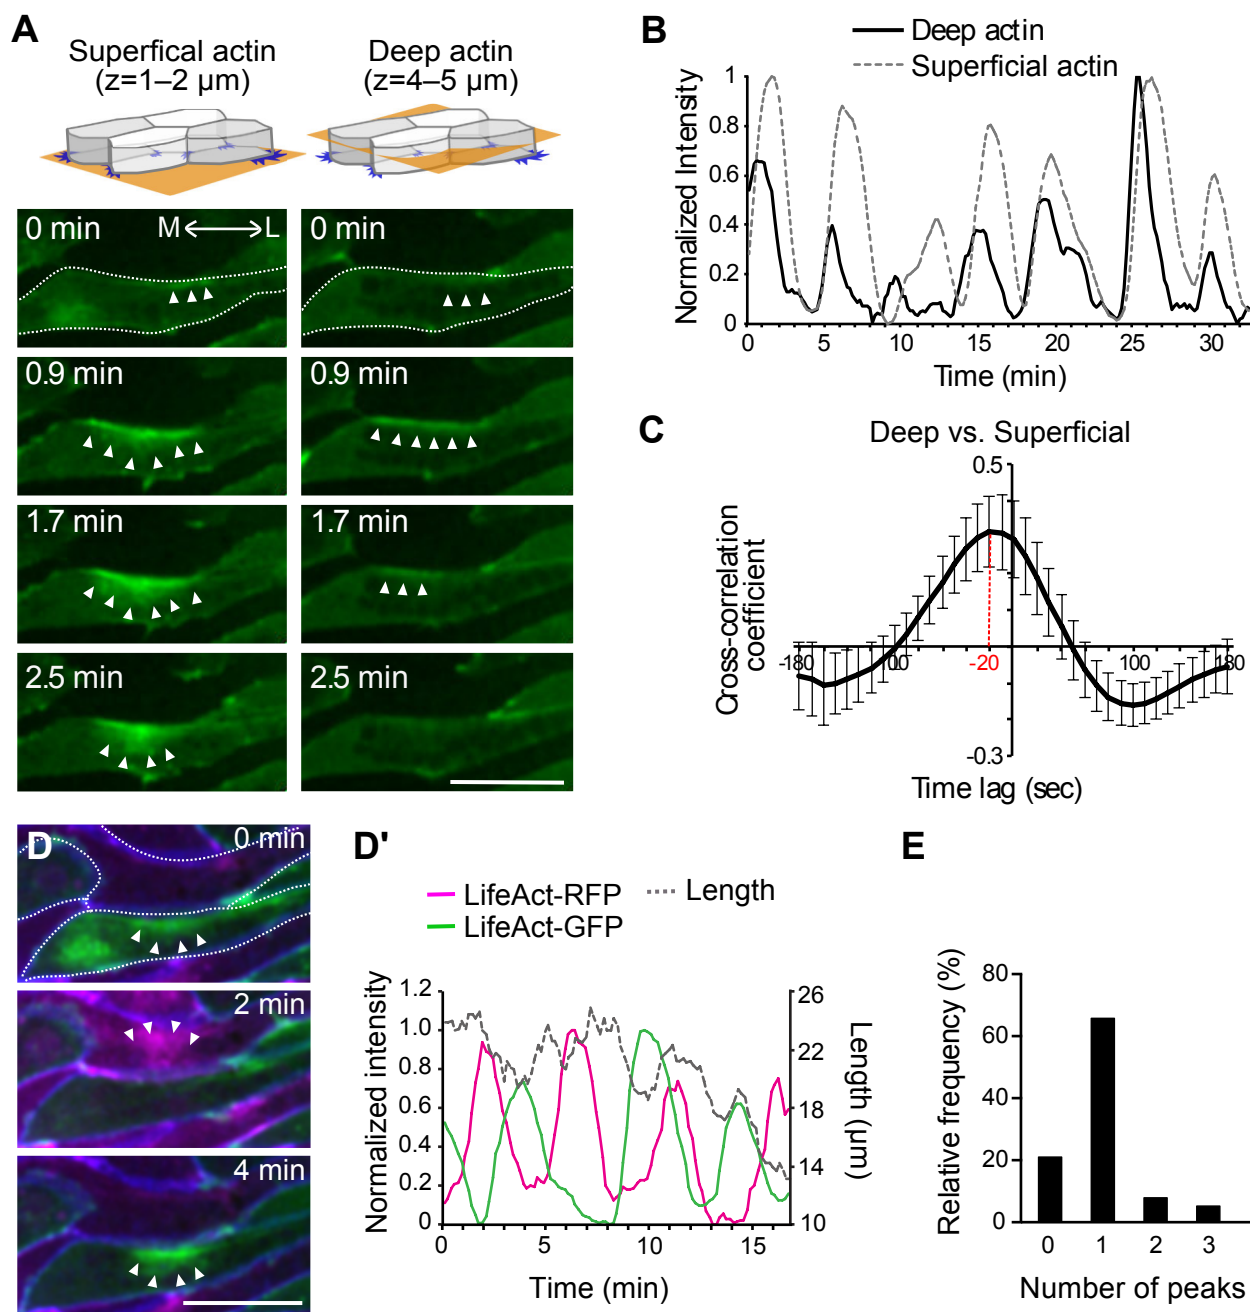

Shindo et al.  
Fig. 1

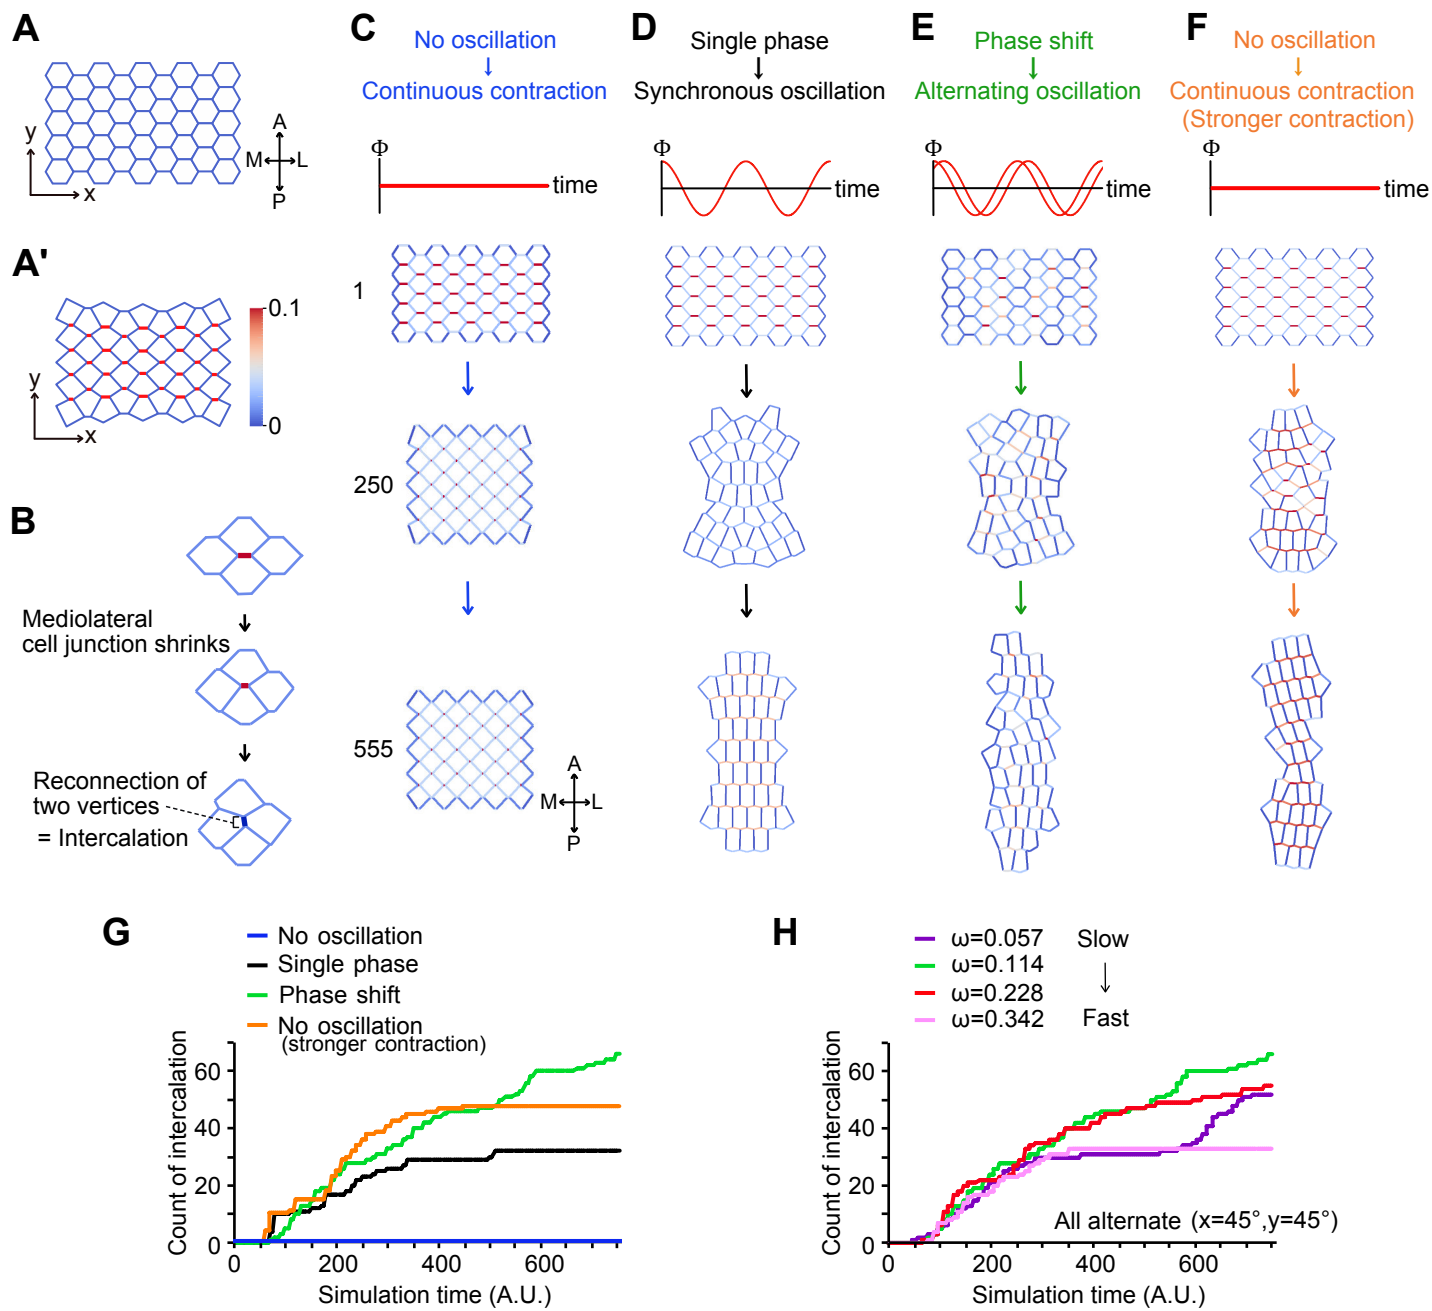

Shindo et al.  
Fig. 2

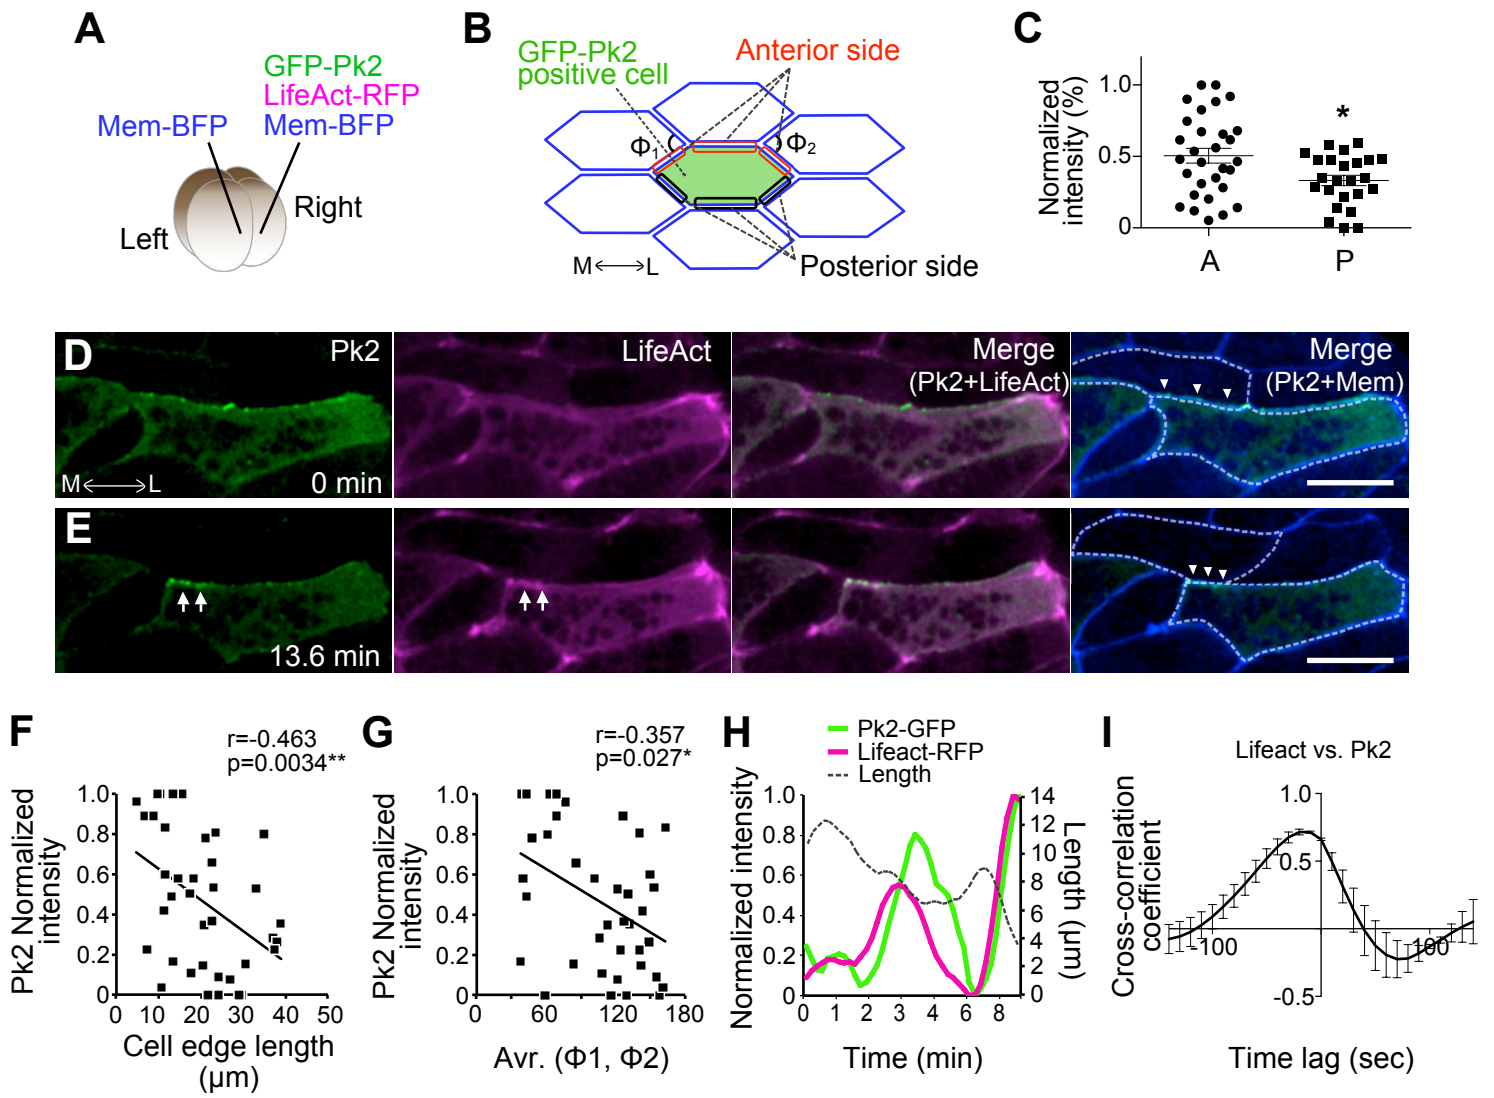

Shindo et al.  
Fig. 3

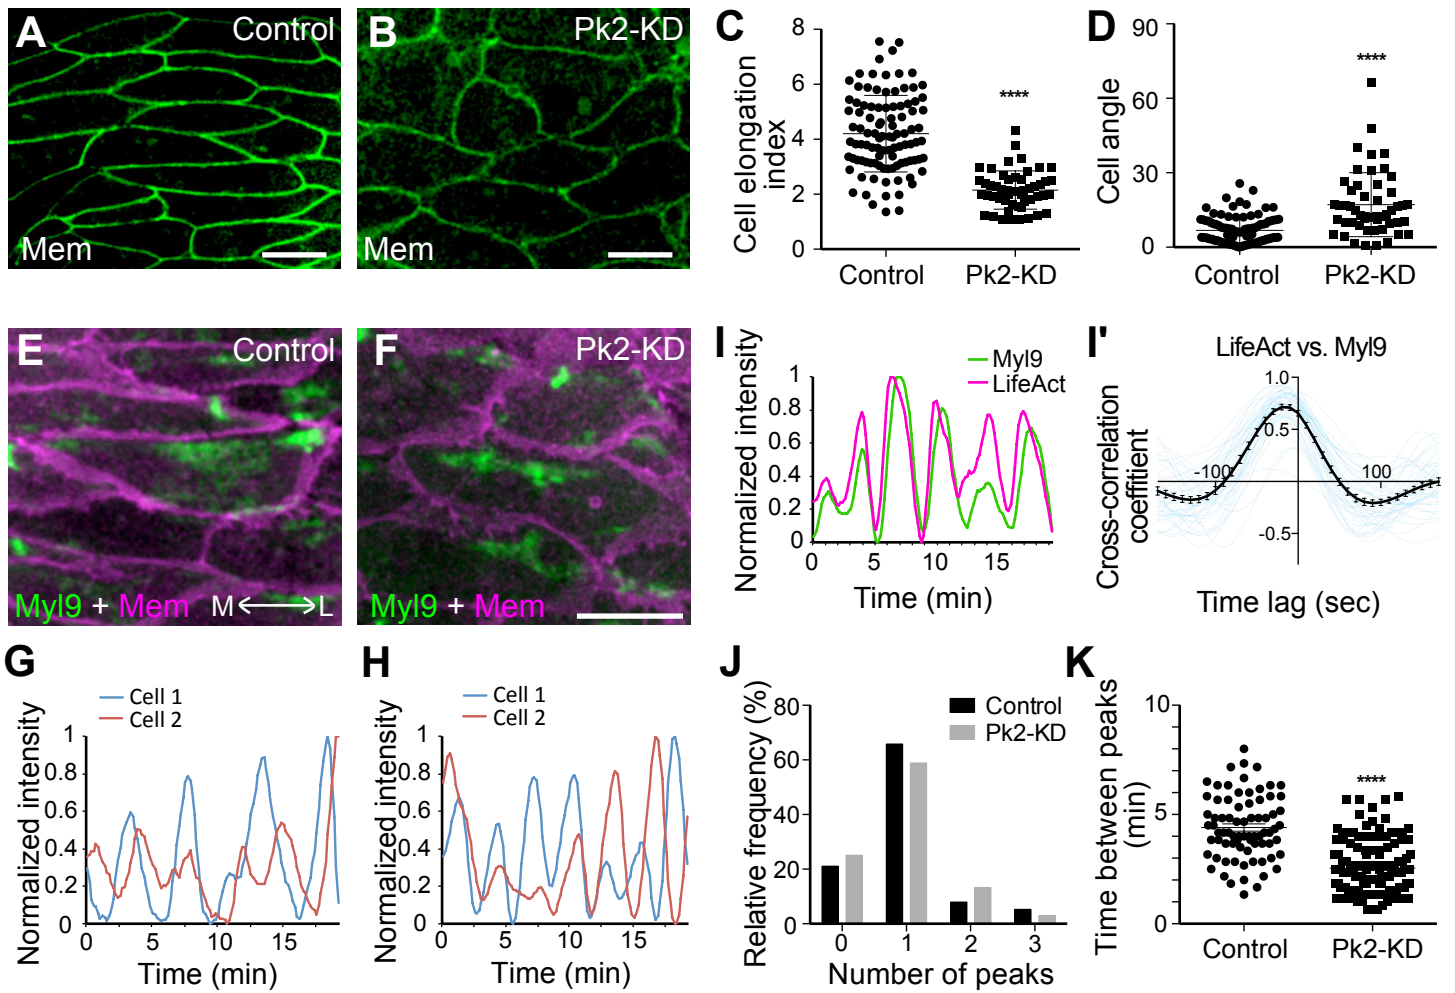

Shindo et al.  
Fig. 4

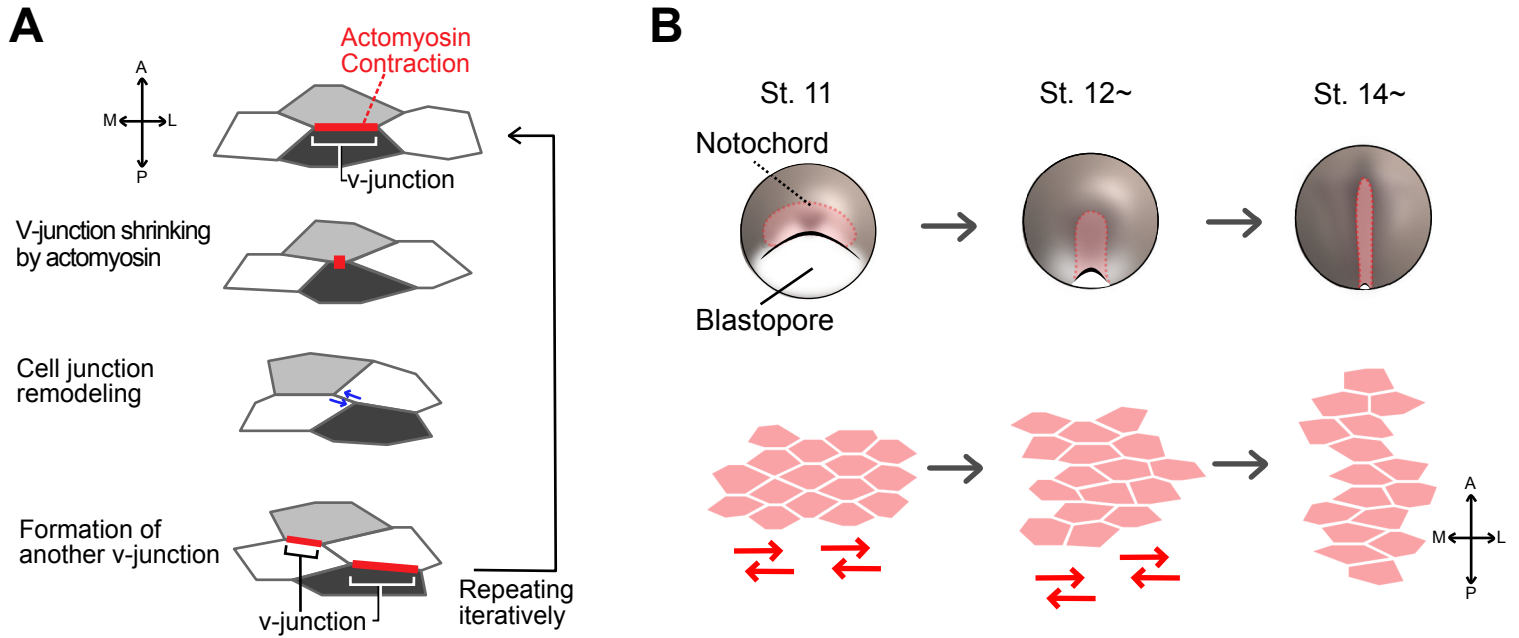

**A** Superficial actin

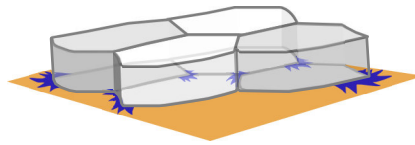

**B** Deep actin

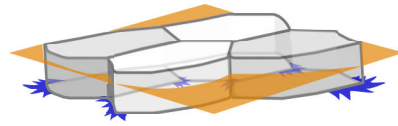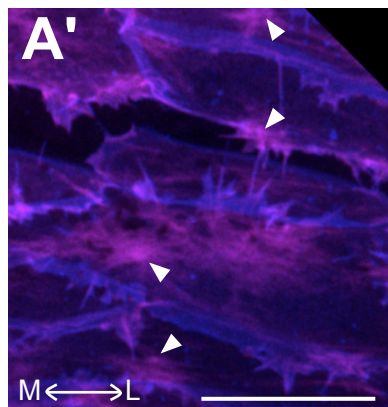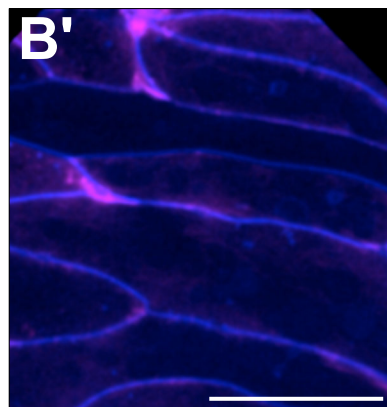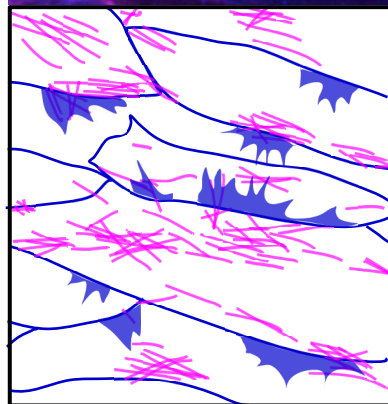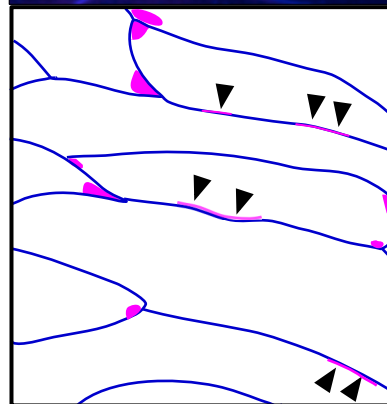

LifeAct cell membrane



### 1. Raw intensity

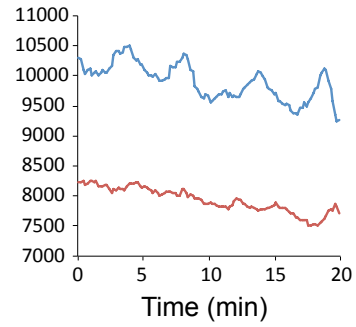

### 2. Smoothing (moving average)

| Time (sec) | Raw intensity | Average of 5 time points | Moving average |
|------------|---------------|--------------------------|----------------|
| 0          | 10305.5       |                          | 10163.0        |
| 10         | 10276.9       |                          | 10125.5        |
| 20         | 10107.7       |                          | 10071.5        |
| 30         | 10036.0       |                          | 10060.0        |
| 40         | 10089.0       |                          | 10069.3        |
| 50         | 10117.7       |                          |                |
| 60         | 10006.8       |                          |                |
| 70         | 10050.2       |                          |                |
| 80         | 10082.8       |                          |                |

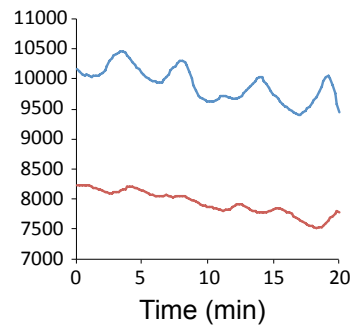

### 3. Subtract baseline (Correction for background, bleaching)

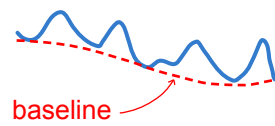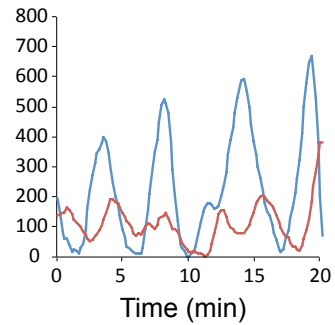

### 4. Convert to ratio (0 to 1)

min=0, max=1

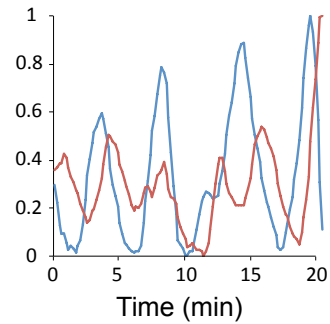

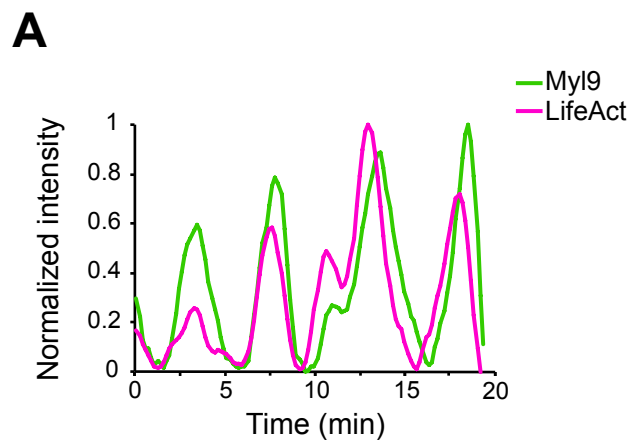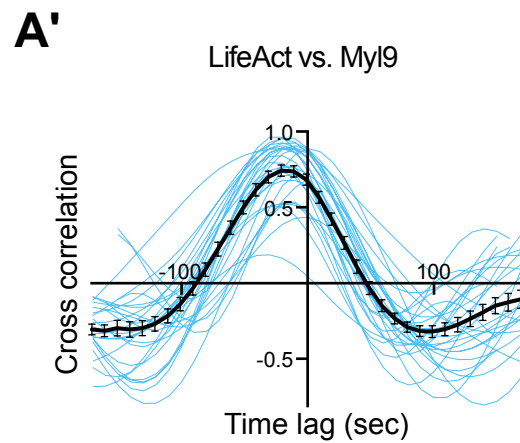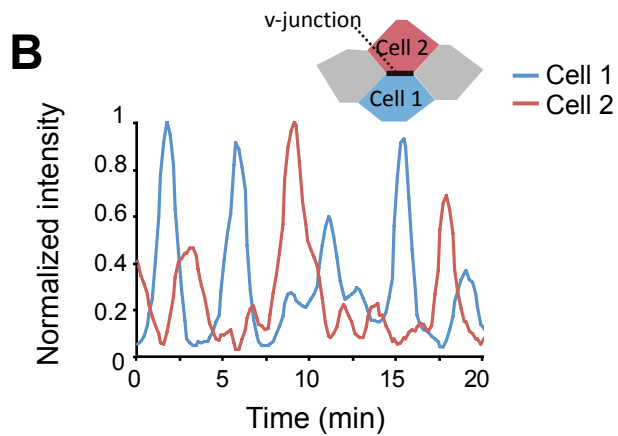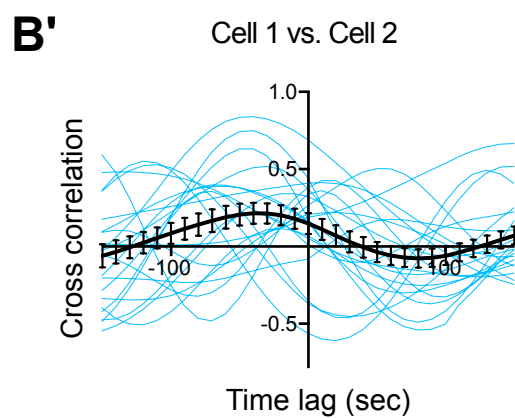



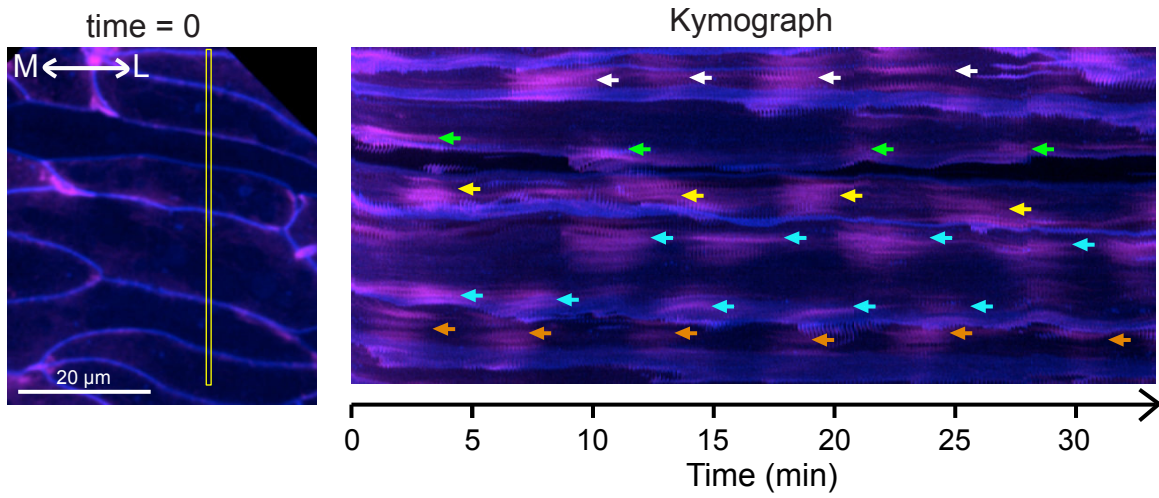

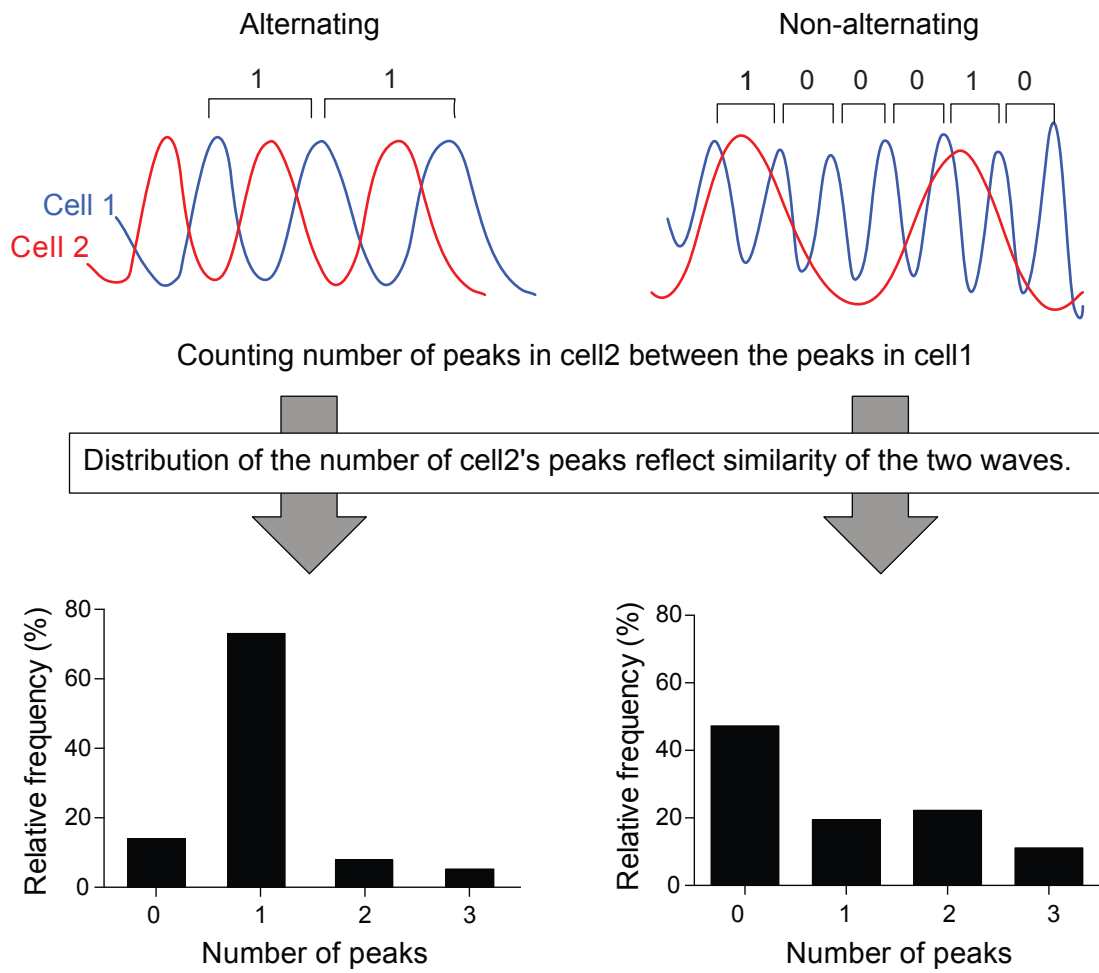

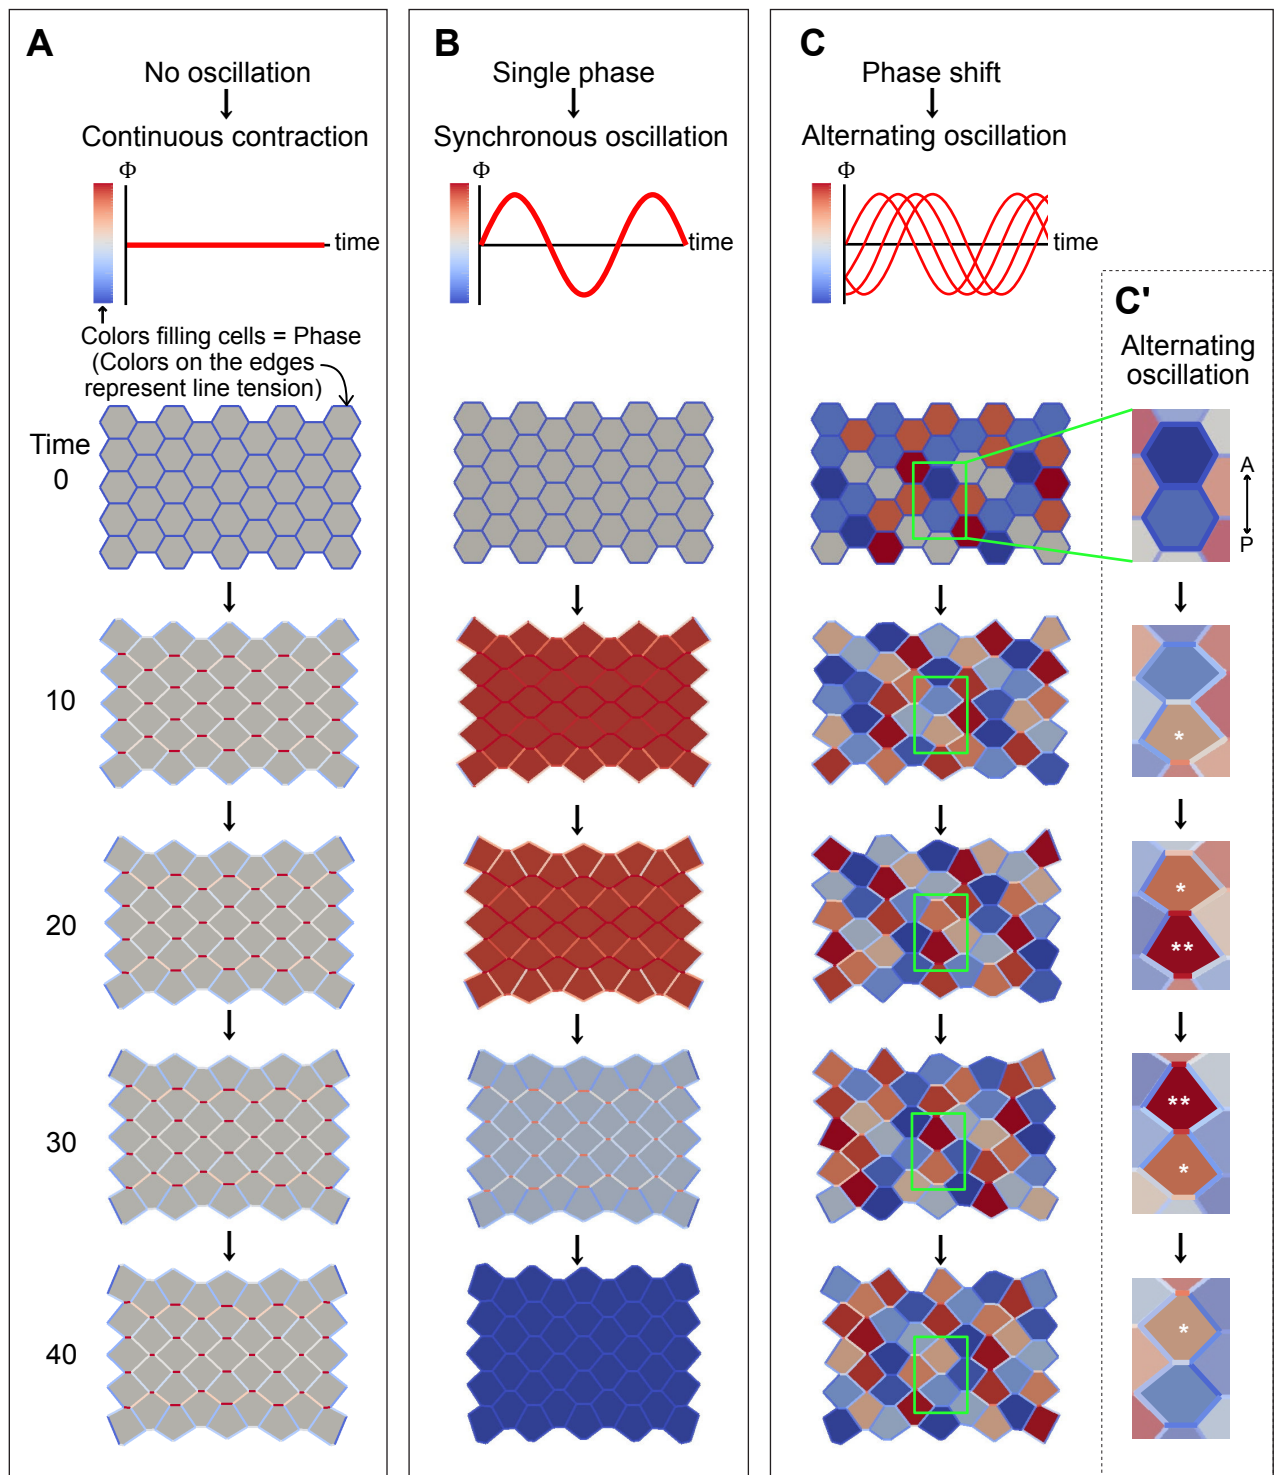

Supplement: NIHMS1517859-supplement-1.pdf [file NIHMS1517859-supplement-1.pdf]
